# Supplementary material for: Hybrid CuSn nanosphere-functionalized Cu/Sn co-doped hollow carbon nanofibers as anode materials for sodium-ion batteries
Source: Royal Society of Chemistry journal article supplement (doi:10.1039/d3nr02414h), 2023-01-01
Supplement: d3nr02414h1.pdf [file d3nr02414h1.pdf]

## Supporting Information

### Hybrid CuSn nanospheres functionalizing Cu/Sn co-doping hollow carbon nanofibers as anode materials for sodium-ion batteries

Xuwu Xiao,<sup>a</sup> Wenli Yao,<sup>a,c\*</sup> Tingting Yan,<sup>a</sup> Wenyao Zhang,<sup>a</sup> Qian Zhang,<sup>a,c</sup> Shengwen Zhong<sup>a</sup>  
and Zhengquan Yan<sup>b,\*</sup>

<sup>a</sup>Jiangxi Key laboratory of Power Battery and Material, Faculty of Materials Metallurgy and Chemistry, Jiangxi University of Science and Technology, Ganzhou 341000, China

<sup>b</sup>School of Chemistry and Chemical Engineering, Qufu Normal University, Qufu, 273165, China

<sup>c</sup>Yichun Lithium New Energy Industry Research Institute, Jiangxi University of Science and Technology, Ganzhou 341000, China

\* E-mail address: [wenliyao@126.com](mailto:wenliyao@126.com); [yanzhq2008@163.com](mailto:yanzhq2008@163.com)

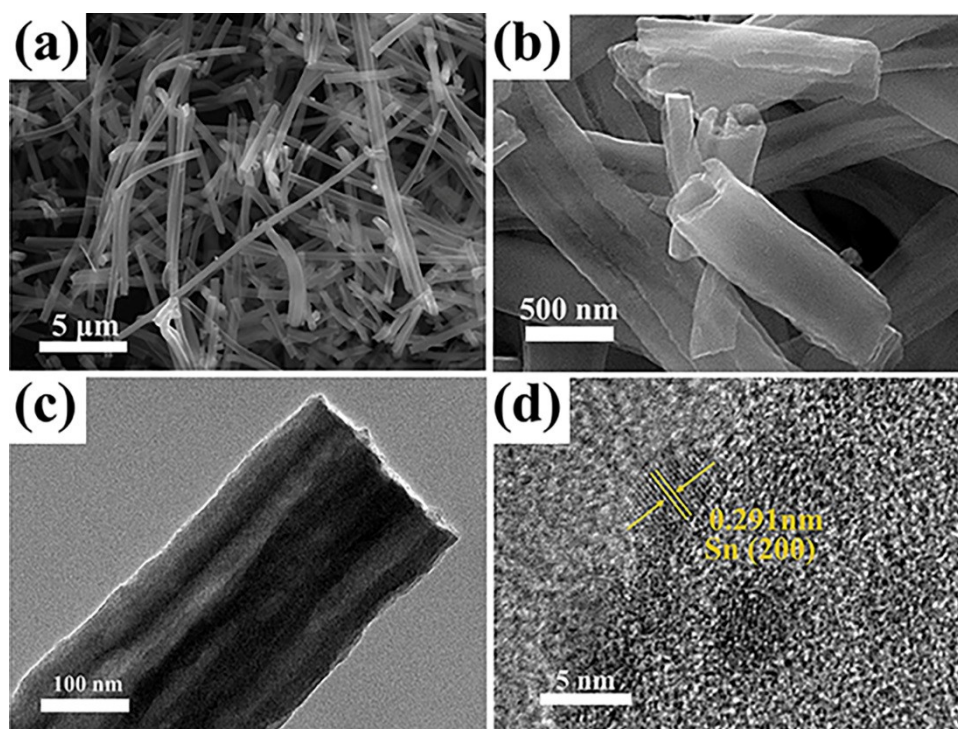

**Figure S1.** (a,b) FE-SEM images of Sn-SnO<sub>x</sub>@MCNF; (c,d) TEM and HRTEM image of Sn-SnO<sub>x</sub>@MCNF.

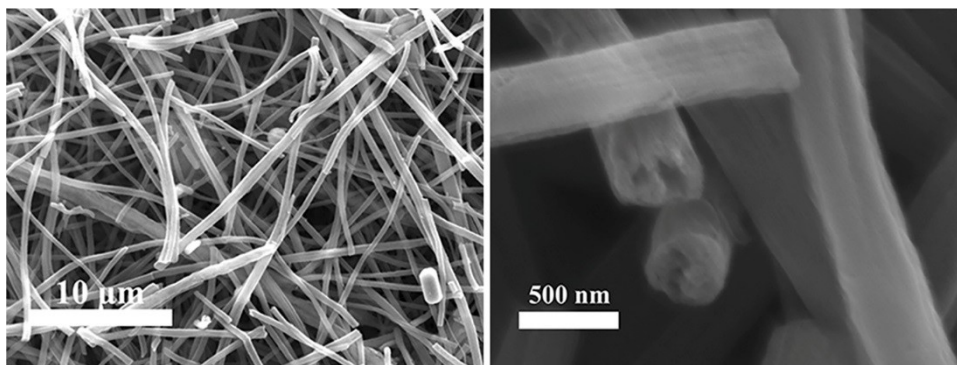

Figure S2. FE-SEM images of Cu@MCNF.

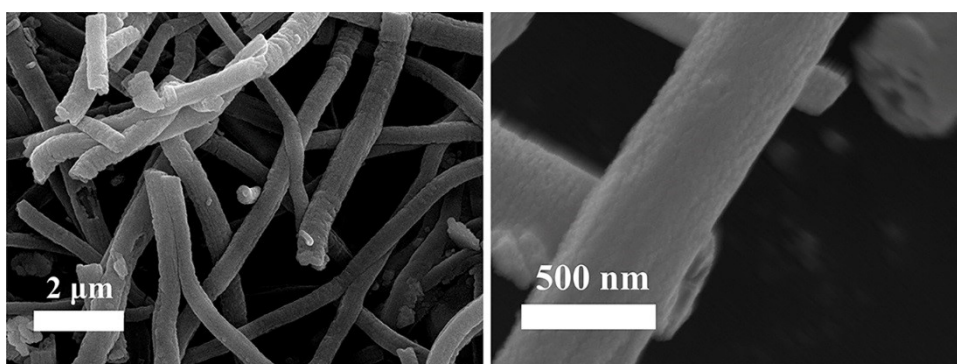

Figure S3. FE-SEM images of pure MCNF.

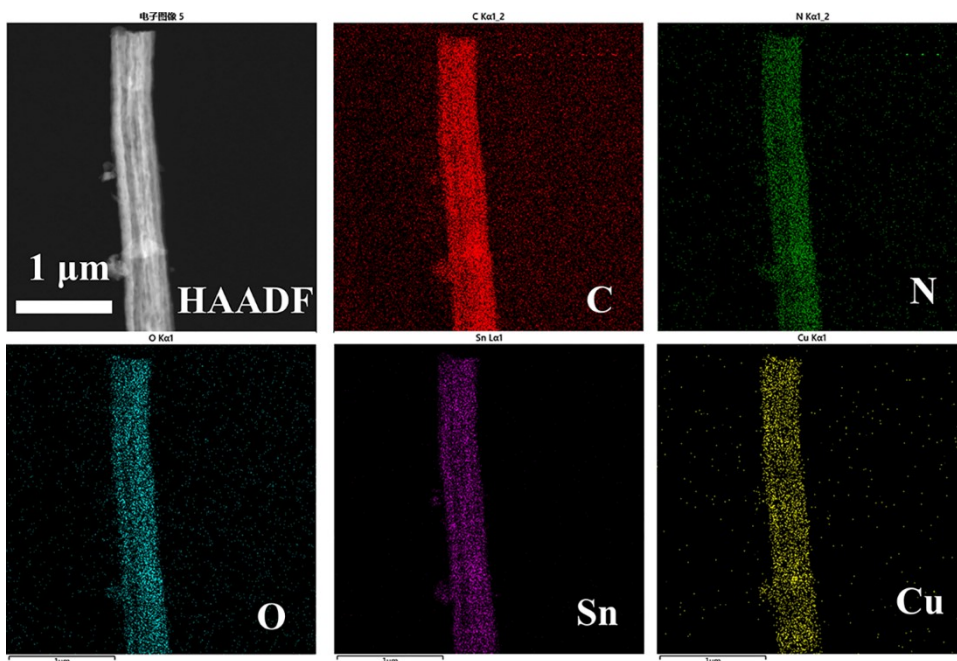

Figure S4. TEM-mapping images of CuSn/C@MCNF.

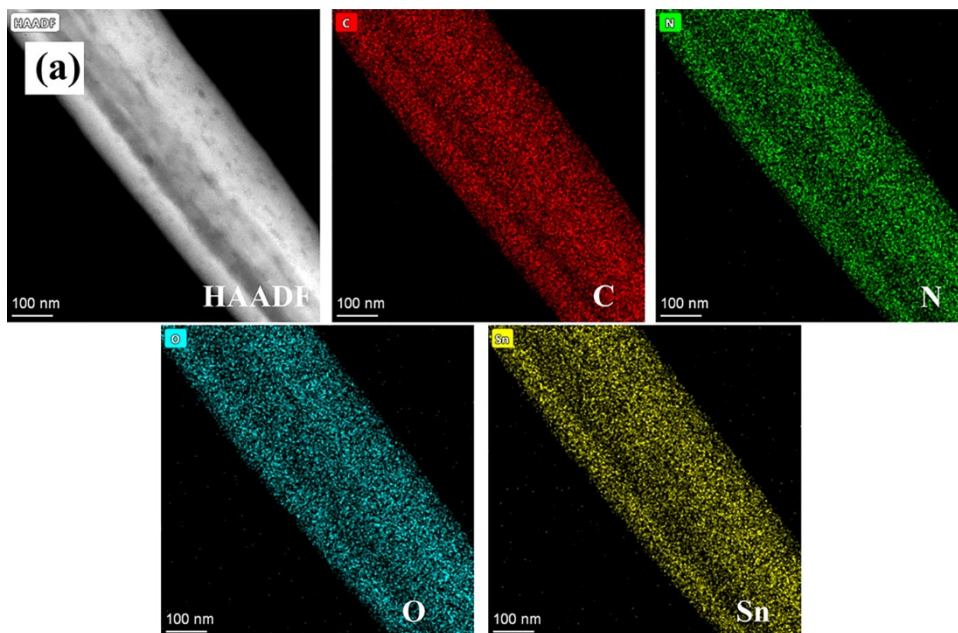

Figure S5. TEM-mapping images of Sn-SnO<sub>x</sub>@MCNF.

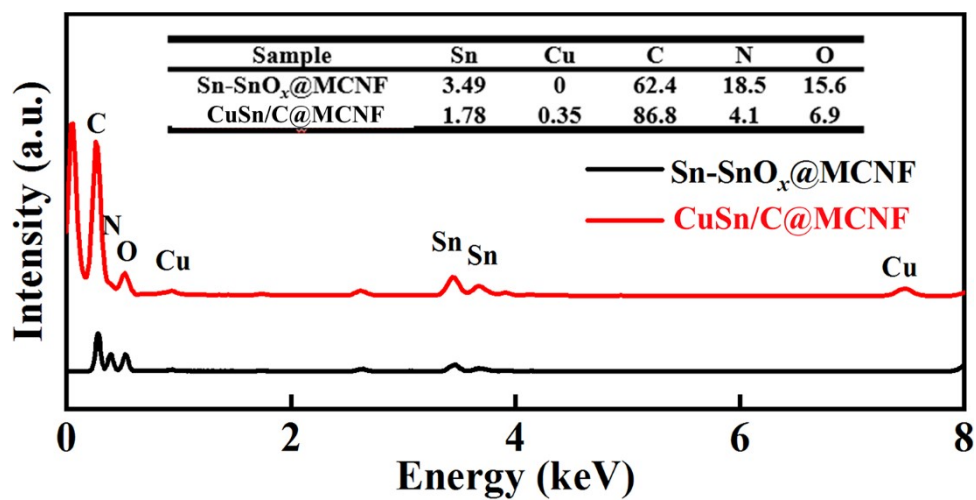

Figure S6. EDS spectra and atomic concentrations of elements in CuSn/C@MCNF and Sn-SnO<sub>x</sub>@MCNF obtained from TEM-mapping analysis.

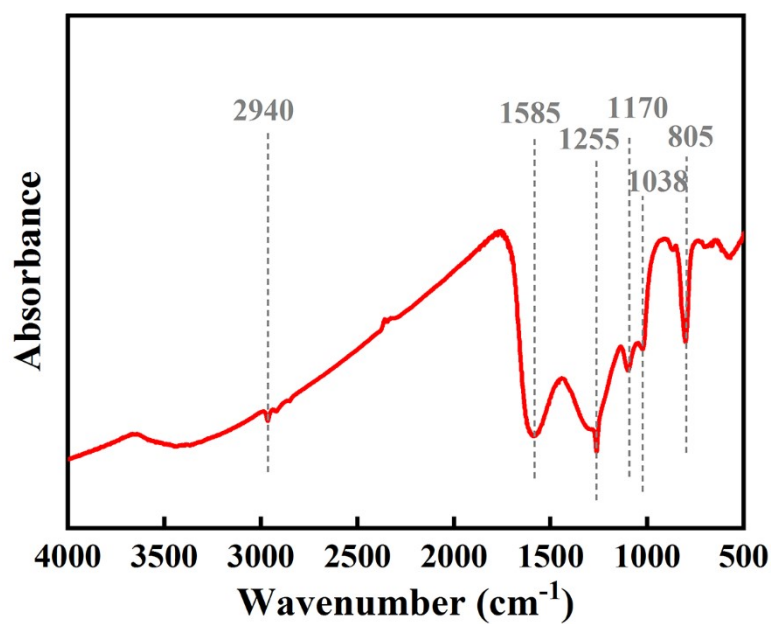

Figure S7. FTIR spectrum of CuSn/C@MCNF.

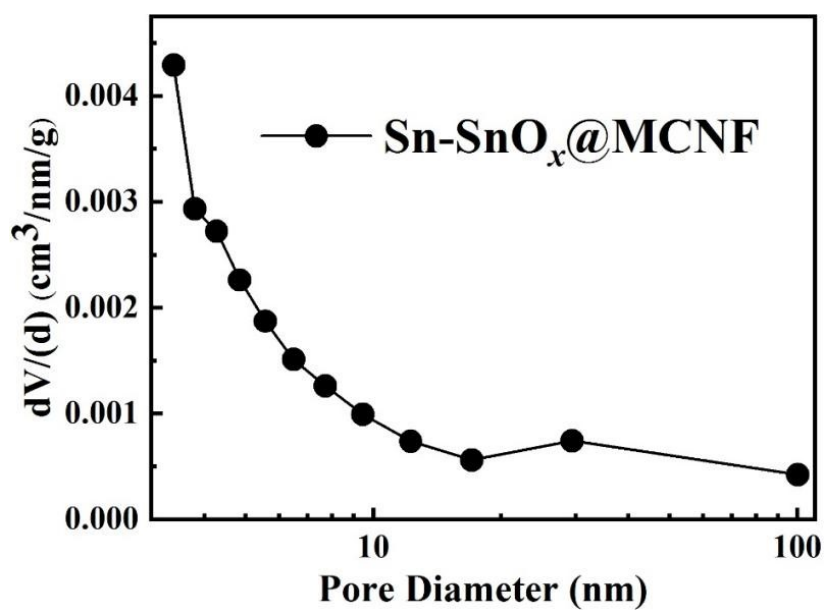

Figure S8. Pore size distribution of Sn-SnO<sub>x</sub>@MCNF.

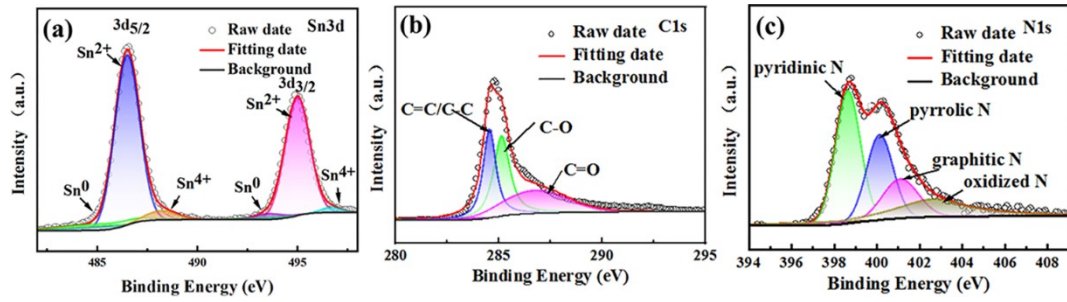

**Figure S9.** The high-resolution XPS spectrum of (a) Sn3d, (b) C1s, (c) N1s of Sn-SnO<sub>x</sub>@MCNF.

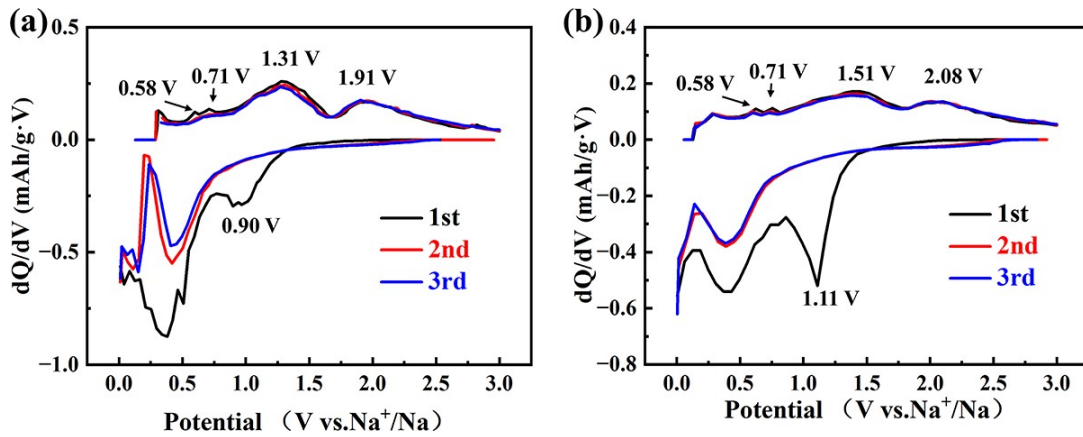

**Figure S10.** The  $dQ/dV$  curves for the first three cycles of (a) Sn-SnO<sub>x</sub>@MCNF and (b) CuSn/C@MCNF.

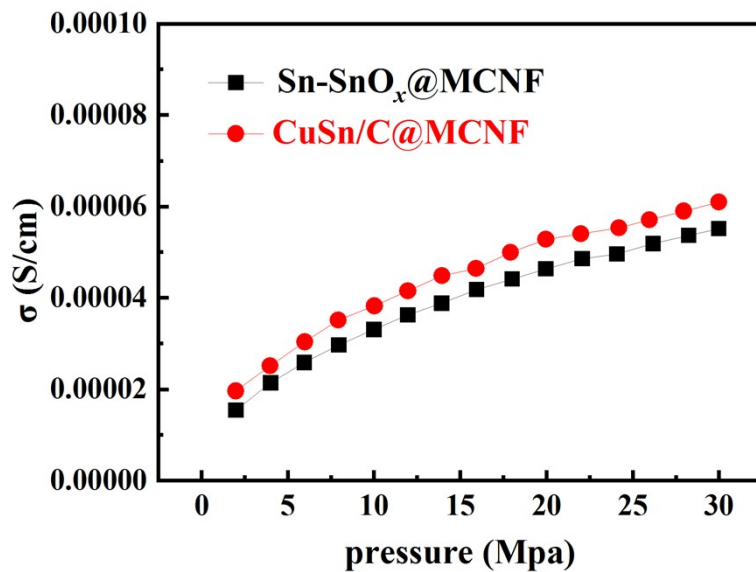

**Figure S11.** The electrical conductivity of Sn-SnO<sub>x</sub>@MCNF and CuSn/C@MCNF at different pressures.

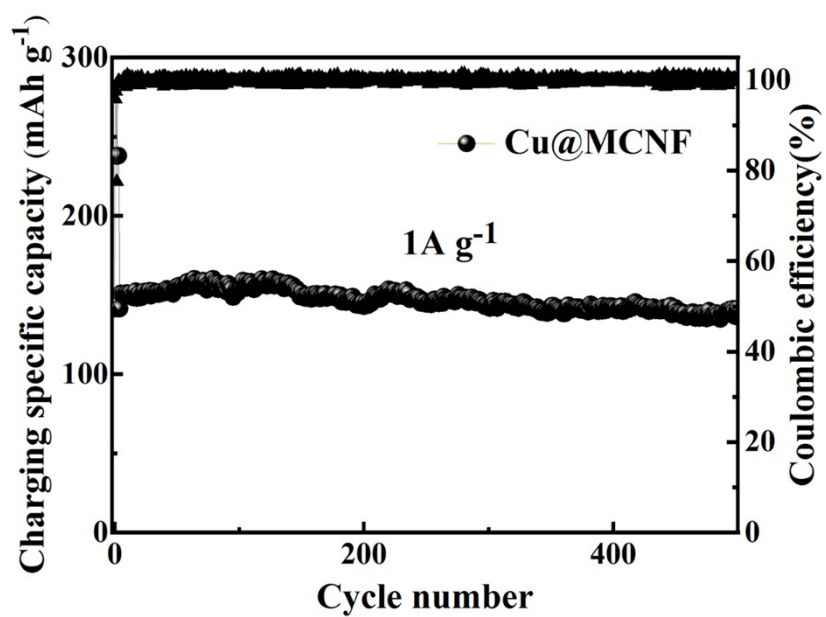

Figure S12. Discharge/charge curves of the Cu@MCNF electrode for 500 cycles.

**Table S1.** Atomic concentrations (at.%) of elements in Sn-SnO<sub>x</sub>@MCNF and CuSn/C@MCNF obtained from the corresponding XPS analysis.

| <b>Sample</b>                  | <b>Sn/(at.%)</b> | <b>Cu/(at.%)</b> | <b>C/(at.%)</b> | <b>N/(at.%)</b> | <b>O/(at.%)</b> |
|--------------------------------|------------------|------------------|-----------------|-----------------|-----------------|
| <b>Sn-SnO<sub>x</sub>@MCNF</b> | <b>3.49</b>      | <b>0</b>         | <b>62.4</b>     | <b>6.92</b>     | <b>9.25</b>     |
| <b>CuSn/C@MCNF</b>             | <b>1.35</b>      | <b>0.61</b>      | <b>79.17</b>    | <b>9.04</b>     | <b>9.83</b>     |

**Table S2.** The EIS fitting parameters of Sn-SnO<sub>x</sub>@MCNF and CuSn/C@MCNF electrodes after three cycles at a current density of 0.1 A g<sup>-1</sup>.

| <b>Sample</b>                  | <b>R<sub>ct</sub>(Ω)</b> | <b>R<sub>s</sub>(Ω)</b> |
|--------------------------------|--------------------------|-------------------------|
| <b>Sn-SnO<sub>x</sub>@MCNF</b> | <b>169.9</b>             | <b>9.679</b>            |
| <b>CuSn/C@MCNF</b>             | <b>82.24</b>             | <b>5.696</b>            |
